# Supplementary material for: Compensatory functional reorganization may precede hypertension-related brain damage and cognitive decline: a functional magnetic resonance imaging study
Source: PubMed Central journal article supplement — J Hypertens. 2017 Feb 7;35(6):1252–62. doi: 10.1097/HJH.0000000000001293 (PMC5404398; doi:10.1097/hjh.0000000000001293), 2017-02-07
Supplement: jhype-35-1252-s002.pdf [file jhype-35-1252-s002.pdf]

# Compensatory Functional Reorganization May Precede Hypertension-Related Brain Damage and Cognitive Decline: a functional Magnetic Resonance Imaging Study

Naumczyk, P., Sabisz, A., Witkowska, M., Graff, B., Jodzio, K., Gąsecki, D., Szurowska, E., Narkiewicz, K.

## Supplemental Digital Content 2

Table. Direct coordinates and anatomical labels of the clusters, which BOLD response was related to subjects' WHR or BMI values presented in alphabetical order. Labels based on the Automated Anatomical Labelling software.

| Anatomical region                                        | x   | y   | z   | Z    | No. of voxels |
|----------------------------------------------------------|-----|-----|-----|------|---------------|
| LH Amygdala                                              | -28 | 0   | -18 | 4.86 | 2             |
| LH Anterior cingulate and paracingulate gyri             | -4  | 38  | 6   | 5.58 | 3             |
| LH Anterior cingulate and paracingulate gyri             | -8  | 28  | -6  | 5.10 | 1             |
| LH Calcarine fissure and surrounding cortex              | -16 | -78 | 12  | 6.07 | 75            |
| LH Inferior frontal gyrus, opercular part                | -34 | 8   | 24  | 5.74 | 59            |
| LH Inferior frontal gyrus, orbital part                  | -46 | 14  | -6  | 5.06 | 7             |
| LH Inferior frontal gyrus, orbital part                  | -38 | 40  | -8  | 5.01 | 2             |
| LH Inferior frontal gyrus, triangular part               | -44 | 12  | 28  | 4.88 | 2             |
| LH Inferior frontal gyrus, triangular part               | -38 | 24  | 24  | 4.82 | 1             |
| LH Inferior parietal, but supramarginal and angular gyri | -40 | -46 | 48  | 5.71 | 43            |
| LH Inferior parietal, but supramarginal and angular gyri | -58 | -40 | 38  | 4.85 | 1             |
| LH Inferior temporal gyrus                               | -52 | -56 | -12 | 4.86 | 2             |
| LH Lingual gyrus                                         | -20 | -44 | -8  | 5.23 | 6             |
| LH Middle frontal gyrus                                  | -32 | 42  | 14  | 6.06 | 13            |
| LH Middle occipital gyrus                                | -34 | -68 | 6   | 5.69 | 15            |
| LH Middle occipital gyrus                                | -44 | -72 | 6   | 5.08 | 7             |
| LH Middle temporal gyrus                                 | -50 | -70 | 18  | 5.45 | 12            |
| LH Middle temporal gyrus                                 | -60 | -42 | 4   | 5.03 | 7             |
| LH Middle temporal gyrus                                 | -60 | -8  | -8  | 4.94 | 5             |
| LH Middle temporal gyrus                                 | -58 | -58 | 4   | 4.92 | 2             |
| LH Precentral gyrus                                      | -32 | -18 | 58  | 5.47 | 16            |

|                                              |     |     |     |      |     |
|----------------------------------------------|-----|-----|-----|------|-----|
| LH Precentral gyrus                          | -42 | -2  | 20  | 4.87 | 2   |
| LH Precentral gyrus                          | -34 | -20 | 50  | 4.84 | 1   |
| LH Rolandic operculum                        | -52 | -18 | 20  | 6.34 | 147 |
| LH Superior frontal gyrus, dorsolateral part | -18 | 64  | 10  | 6.02 | 14  |
| LH Superior frontal gyrus, dorsolateral part | -20 | 6   | 68  | 5.41 | 8   |
| LH Superior frontal gyrus, dorsolateral part | -18 | 52  | 12  | 4.81 | 2   |
| LH Superior frontal gyrus, dorsolateral part | -18 | 54  | 2   | 4.83 | 1   |
| LH Superior frontal gyrus, medial            | 2   | 54  | 30  | 4.92 | 2   |
| LH Superior frontal gyrus, medial            | -12 | 56  | 2   | 5.22 | 1   |
| LH Superior occipital gyrus                  | -14 | -92 | 10  | 5.91 | 20  |
| LH Superior parietal gyrus                   | -18 | -78 | 48  | 5.46 | 5   |
| LH Superior temporal gyrus                   | -54 | 4   | -12 | 5.54 | 27  |
| LH Superior temporal gyrus                   | -54 | -36 | 22  | 5.59 | 16  |
| LH Superior temporal gyrus                   | -46 | -12 | 0   | 4.86 | 2   |
| LH Superior temporal gyrus                   | -42 | -42 | 8   | 4.82 | 2   |
| RH Anterior cingulate and paracingulate gyri | 10  | 34  | 14  | 5.36 | 2   |
| RH Calcarine fissure and surrounding cortex  | 24  | -78 | 10  | 6.10 | 35  |
| RH Calcarine fissure and surrounding cortex  | 2   | -82 | 12  | 5.44 | 31  |
| RH Calcarine fissure and surrounding cortex  | 18  | -78 | 12  | 4.91 | 1   |
| RH Caudate nucleus                           | 20  | 26  | -8  | 5.83 | 8   |
| RH Cuneus                                    | 4   | -94 | 10  | 5.58 | 2   |
| RH Hippocampus                               | 20  | -8  | -20 | 4.88 | 1   |
| RH Inferior frontal gyrus, opercular part    | 36  | 10  | 26  | 5.51 | 15  |
| RH Inferior frontal gyrus, triangular part   | 44  | 26  | 26  | 4.81 | 1   |
| RH Insula                                    | 48  | 12  | -4  | 5.36 | 5   |
| RH Lingual gyrus                             | 26  | -74 | 0   | 4.91 | 1   |
| RH Middle temporal gyrus                     | 58  | -44 | -6  | 5.32 | 13  |
| RH Postcentral gyrus                         | 28  | -44 | 72  | 5.43 | 6   |
| RH Precentral gyrus                          | 42  | -2  | 48  | 5.67 | 31  |
| RH Precentral gyrus                          | 36  | -12 | 60  | 5.58 | 17  |
| RH Precuneus                                 | 16  | -46 | 6   | 5.49 | 13  |
| RH Superior frontal gyrus, dorsolateral part | 22  | 10  | 42  | 5.71 | 9   |
| RH Superior frontal gyrus, dorsolateral part | 26  | -12 | 60  | 5.15 | 6   |

|                                              |     |     |     |      |    |
|----------------------------------------------|-----|-----|-----|------|----|
| RH Superior frontal gyrus, dorsolateral part | 18  | 60  | 2   | 5.08 | 6  |
| RH Superior frontal gyrus, medial            | 10  | 60  | 4   | 5.10 | 2  |
| RH Superior frontal gyrus, medial orbital    | 12  | 60  | -2  | 5.46 | 2  |
| RH Superior temporal gyrus                   | 62  | -26 | 2   | 5.57 | 10 |
| RH Superior temporal gyrus                   | 58  | -2  | -10 | 4.80 | 1  |
| RH Supramarginal gyrus                       | 48  | -42 | 26  | 4.89 | 2  |
| Unidentified                                 | -20 | 10  | 34  | 6.32 | 36 |
| Unidentified                                 | 28  | -26 | 6   | 5.99 | 35 |
| Unidentified                                 | 26  | 36  | 18  | 7.56 | 25 |
| Unidentified                                 | 0   | 28  | 10  | 6.29 | 23 |
| Unidentified                                 | -10 | 20  | 22  | 5.77 | 9  |
| Unidentified                                 | 36  | -38 | 10  | 5.37 | 8  |
| Unidentified                                 | -18 | 16  | 24  | 5.62 | 7  |
| Unidentified                                 | -18 | 42  | 18  | 5.89 | 5  |
| Unidentified                                 | -40 | -40 | 6   | 5.32 | 4  |
| Unidentified                                 | -28 | -58 | 4   | 5.25 | 4  |
| Unidentified                                 | 46  | -46 | 10  | 5.32 | 3  |
| Unidentified                                 | 20  | -14 | 52  | 5.15 | 3  |
| Unidentified                                 | -30 | -30 | 0   | 5.14 | 3  |
| Unidentified                                 | 26  | 28  | 2   | 5.11 | 2  |
| Unidentified                                 | 10  | -2  | -2  | 4.90 | 2  |
| Unidentified                                 | 8   | 4   | 26  | 5.25 | 1  |
| Unidentified                                 | 16  | 44  | -12 | 5.12 | 1  |
| Unidentified                                 | -18 | 2   | 32  | 4.98 | 1  |
| Unidentified                                 | 26  | 8   | 34  | 4.89 | 1  |
| Unidentified                                 | 10  | 6   | 28  | 4.85 | 1  |
| Unidentified                                 | -28 | 0   | -10 | 4.81 | 1  |

$p < 0.05$  FWE corrected at voxel level with no minimum cluster threshold, x, y, z are MNI coordinates of the most significant center of the activation within the activated cluster. Z=z-value, LH=left hemisphere, RH=right hemisphere
