# Supplementary material for: Compensatory functional reorganization may precede hypertension-related brain damage and cognitive decline: a functional magnetic resonance imaging study
Source: PubMed Central journal article supplement — J Hypertens. 2017 Feb 7;35(6):1252–62. doi: 10.1097/HJH.0000000000001293 (PMC5404398; doi:10.1097/hjh.0000000000001293), 2017-02-07

# Compensatory Functional Reorganization May Precede Hypertension-Related Brain Damage and Cognitive Decline: a functional Magnetic Resonance Imaging Study

Naumczyk, P., Sabisz, A., Witkowska, M., Graff, B., Jodzio, K., Gąsecki, D., Szurowska, E., Narkiewicz, K.

## Supplemental Digital Content 3

**Figure.** A rendered presentation comparing the results of the full factorial fMRI analysis with correction for multiple comparisons (as reported in the article – columns on the right) and uncorrected results (columns on the left). No significant interaction effect was observed in either situation. The condition main effect does not vary much between the cases. In between groups comparisons additional clusters can be noted when the threshold is lowered. Still, the general effect discussed in the article is notable. Namely – it is the patients group that mostly contributes to the difference observed, and the patients tend to incorporate additional clusters that spread mainly along the midline of the brain. To minimize the possibility of false positive errors, only the corrected results are presented in the main article.

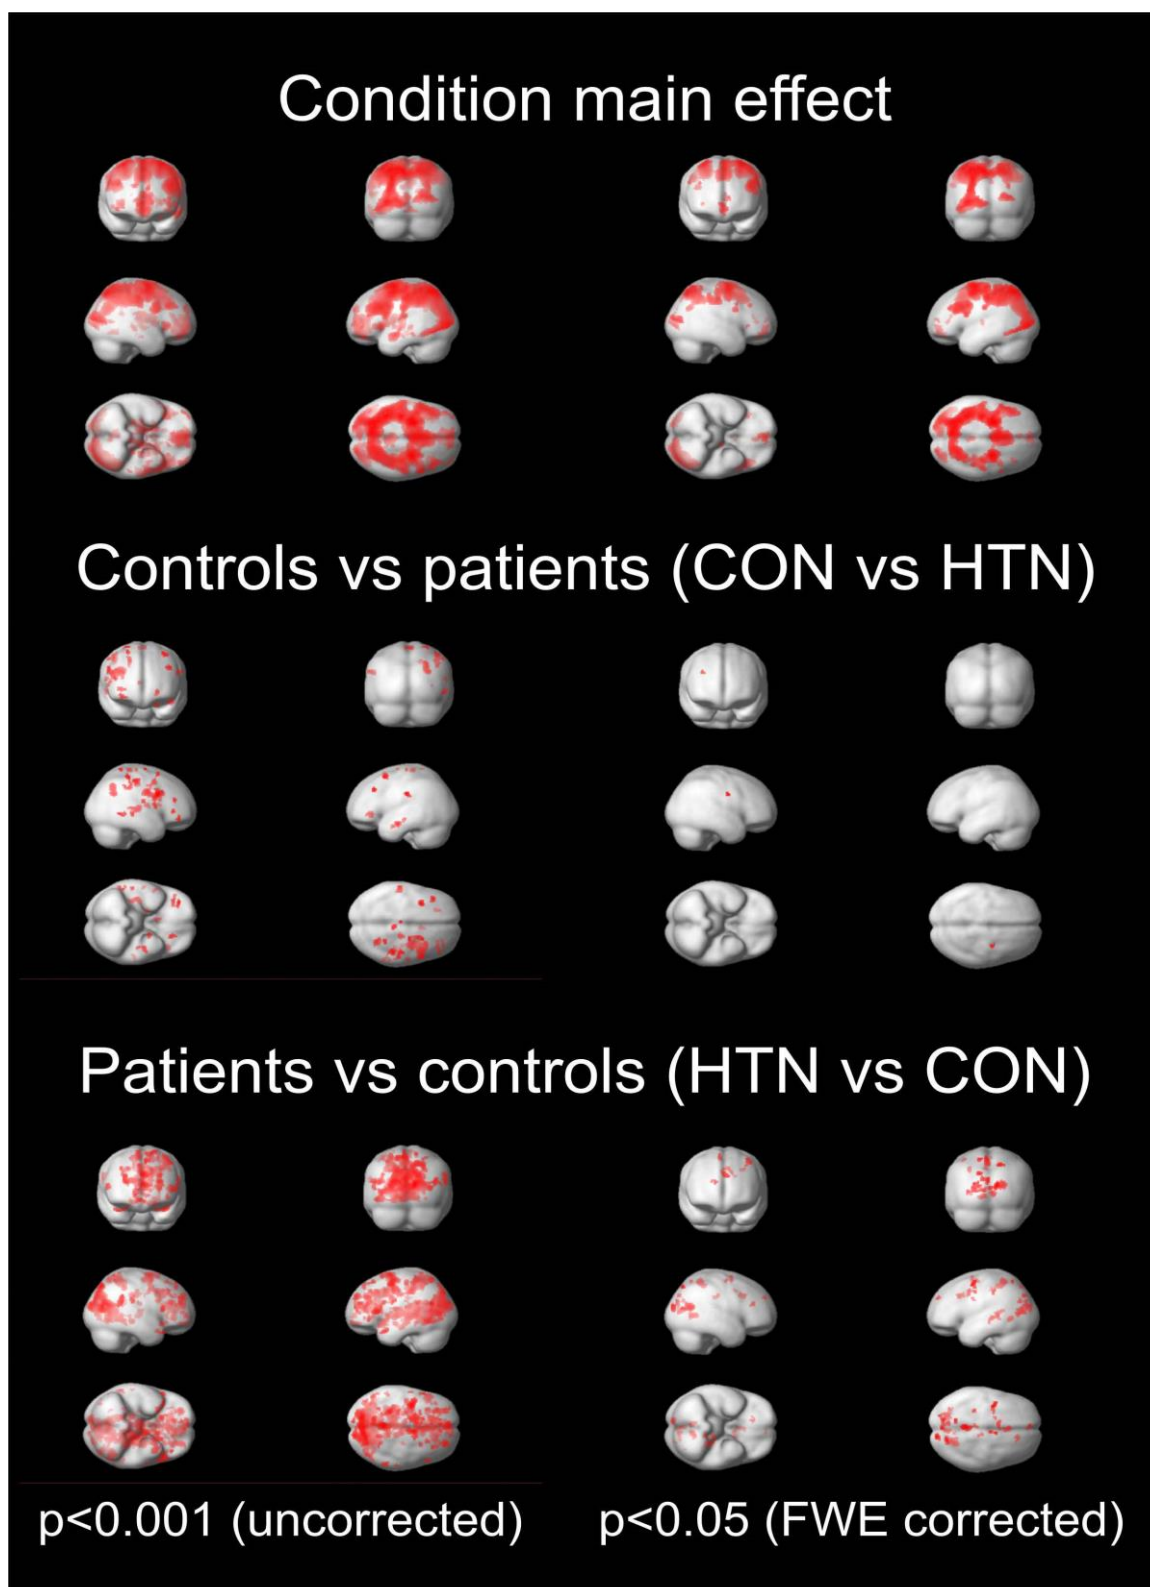

Supplement: jhype-35-1252-s003.pdf [file jhype-35-1252-s003.pdf]
